# Supplementary material for: Comprehensive Effect of Carbon Tetrachloride and Reversal of Gandankang Formula in Mice Liver: Involved in Oxidative Stress, Excessive Inflammation, and Intestinal Microflora
Source: MDPI journal article supplement (doi:10.3390/antiox11112234), 2022-11-12
Supplement: s1 [file s1]

## Supplementary Table

Table S1 Ishak scoring system for liver fibrosis

| Lesion degree                                                                                                                                        | Score |
|------------------------------------------------------------------------------------------------------------------------------------------------------|-------|
| No fiber                                                                                                                                             | 0     |
| Some portal areas have fibrous hyperplasia, with or without short fibrous septum                                                                     | 1     |
| Most portal areas have fibrous hyperplasia, with or without short fibrous septum                                                                     | 2     |
| Most of the portal areas have fibrous hyperplasia, and occasionally the portal areas are bridged by fibers                                           | 3     |
| Fibrous hyperplasia in portal duct area with obvious fibrous bridging (between portal duct and portal duct and between portal duct and central vein) | 4     |
| Obvious bridging (portal tube to portal tube and / or portal tube to central vein) and occasional nodules (incomplete sclerosis)                     | 5     |
| Possible or definite cirrhosis                                                                                                                       | 6     |

Table S2 Ishak scoring system for liver inflammation

| Type                                                             | Lesion degree                                         | Score |
|------------------------------------------------------------------|-------------------------------------------------------|-------|
|                                                                  | None                                                  | 0     |
| Focal (macular) lytic necrosis, apoptosis and focal inflammation | There is 1 necrotic area or less per 10× visual field | 1     |
|                                                                  | There are 2-4 necrotic areas per 10× visual field     | 2     |
|                                                                  | There are 5-10 necrotic areas per 10× visual field    | 3     |
|                                                                  | There are 10 necrotic areas per 10× visual field      | 4     |
|                                                                  | None                                                  | 0     |
| Portal inflammation                                              | Mild, partial or all portal areas                     | 1     |
|                                                                  | Moderate, partial or all portal areas                 | 2     |
|                                                                  | Possible or definite cirrhosis                        | 3     |
|                                                                  | Moderate / severe, all portal areas                   | 4     |
|                                                                  | Serious, all gate tube areas                          | 5     |

Table S3 The antibodies for western blotting

| Antibody | CAT     | Brand  | dilution |
|----------|---------|--------|----------|
| NF-κBp65 | ab32536 | Abcam  | 1:1000   |
| Lamin B1 | P60054  | Abmart | 1:5000   |
| β-actin  | ab8227  | Abcam  | 1:5000   |

Table S4 Primers for qRT-PCR

| Gene          | Primer sequence (5'–3')                                     | GenBank<br>accession no | PCR<br>product<br>T <sub>m</sub> (°C) | PCR<br>product<br>GC% | Product<br>size<br>(bp) |
|---------------|-------------------------------------------------------------|-------------------------|---------------------------------------|-----------------------|-------------------------|
| Nfe2l2        | F: TTGGCAGAGACATTCCCATTG<br>R: AAACCTTGCTCCATGTCCTGCTCTA    | NM_010902.4             | 77.6                                  | 51.7                  | 172                     |
| Hmox1         | F: TGCAGGTGATGCTGACAGAGG<br>R: GGGATGAGCTAGTGCTGATCTGG      | NM_001359638.1          | 79.4                                  | 57.6                  | 144                     |
| Nqo1          | F: CAGCCAATCAGCGTTCGGTA<br>R: CTTCATGGCGTAGTTGAATGATGTC     | NM_008706.5             | 76.2                                  | 52.1                  | 117                     |
| Keap1         | F: AGCAGATCGGCTGCACTGAA<br>R: AGCTGGCAGTGTGACAGGTTG         | NM_001110307.1          | 78.1                                  | 57.8                  | 109                     |
| IL1B1         | F: TGGCAACTGTTCCCTG<br>R: GGAAGCAGCCCTTCATCTTT              | NM_008361.4             | 75.7                                  | 52.4                  | 105                     |
| TNF- $\alpha$ | F: CACGTCGTAGCAAACCACCAAGTGGA<br>R: TGGGAGTAGACAAGGTACAACCC | NM_001278601.1          | 75.5                                  | 52.5                  | 140                     |
| Acs14         | F: GAAAGGCTATGACGCCCTC<br>R: ATCATGCGGACATTCCCTCC           | XM_011247843.4          | 68.7                                  | 55.2                  | 125                     |
| Slc7a11       | F: TGCCCGGATCCAGATTTTCC<br>R: CCAAGGGCAACCCCATAGA           | XM_017319590.3          | 70.2                                  | 54                    | 152                     |
| Gpx4          | F: CCATGCACGAATTCTCAGCC<br>R: GGTGACGATGCACACGAAAC          | NM_001367995.1          | 72.5                                  | 54.3                  | 83                      |
| Gapdh         | F: TGTGTCCGTCGTGGATCTGA<br>R: TTGCTGTTGAAGTCGCAGGAG         | NM_001289726            | 78.6                                  | 55.3                  | 150                     |

## Supplementary Figure

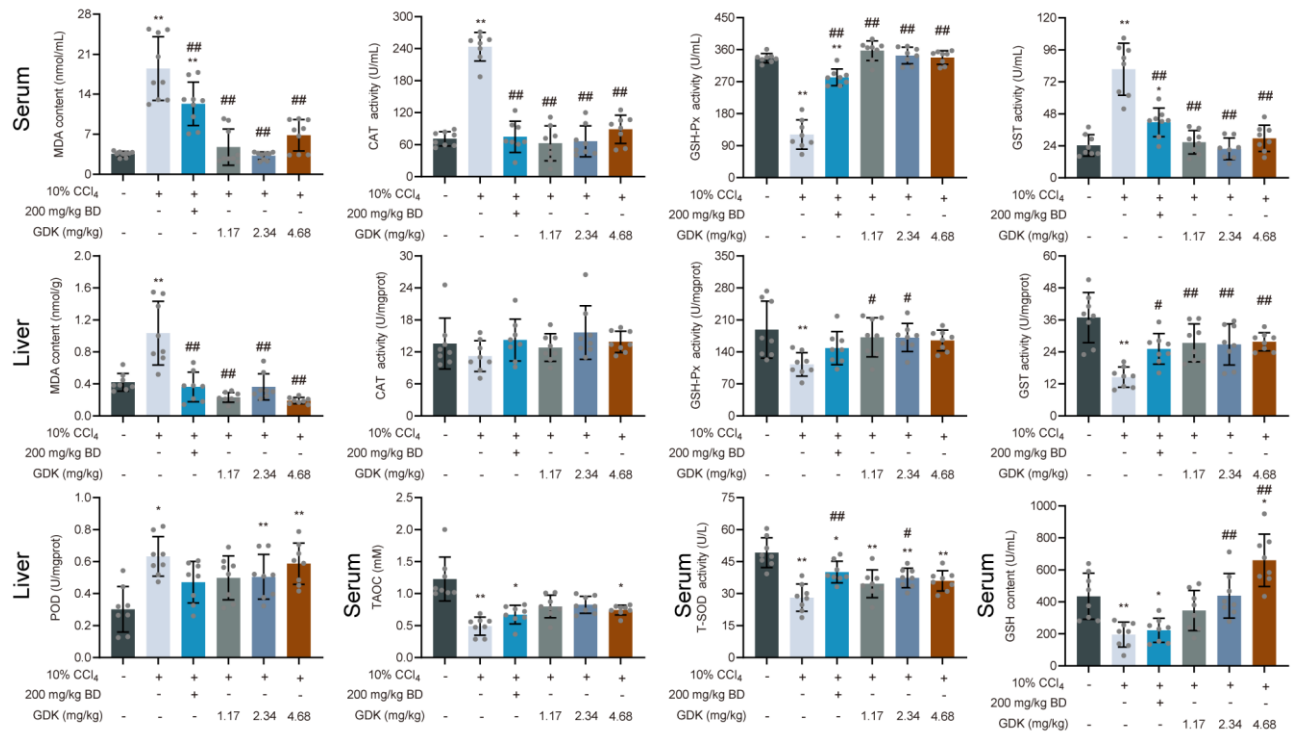

Figure S1 Levels of serum and liver antioxidants in indicated mice. n = 8 samples per group.
